# Supplementary material for: Docosahexaenoic Acid and Arachidonic Acid Levels Are Associated with Early Systemic Inflammation in Extremely Preterm Infants
Source: PubMed Central journal article supplement (PMC7400618; doi:10.3390/nu12071996), 2020-07-05
Supplement: nutrients-12-01996-s001.pdf [file nutrients-12-01996-s001.pdf]

Supplement

**A**

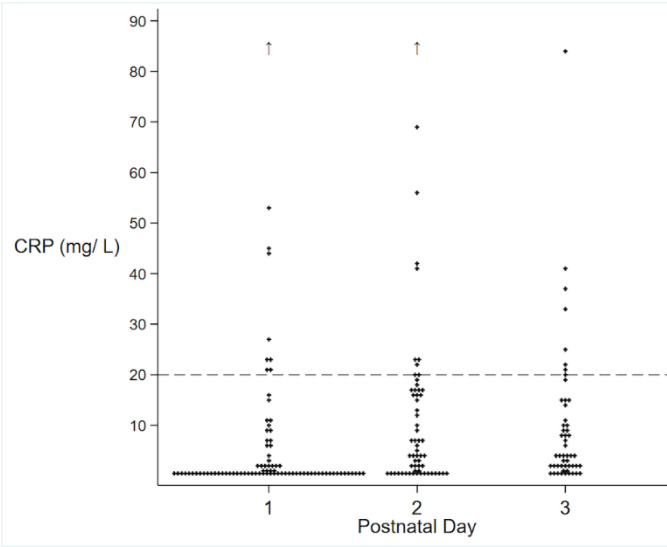

**B**

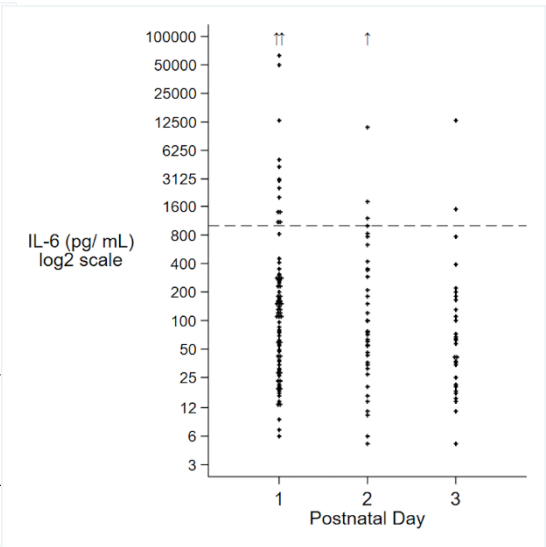

**Figure S1.** Distribution of clinical samples of (A) CRP, and (B) IL-6 the first three postnatal days.

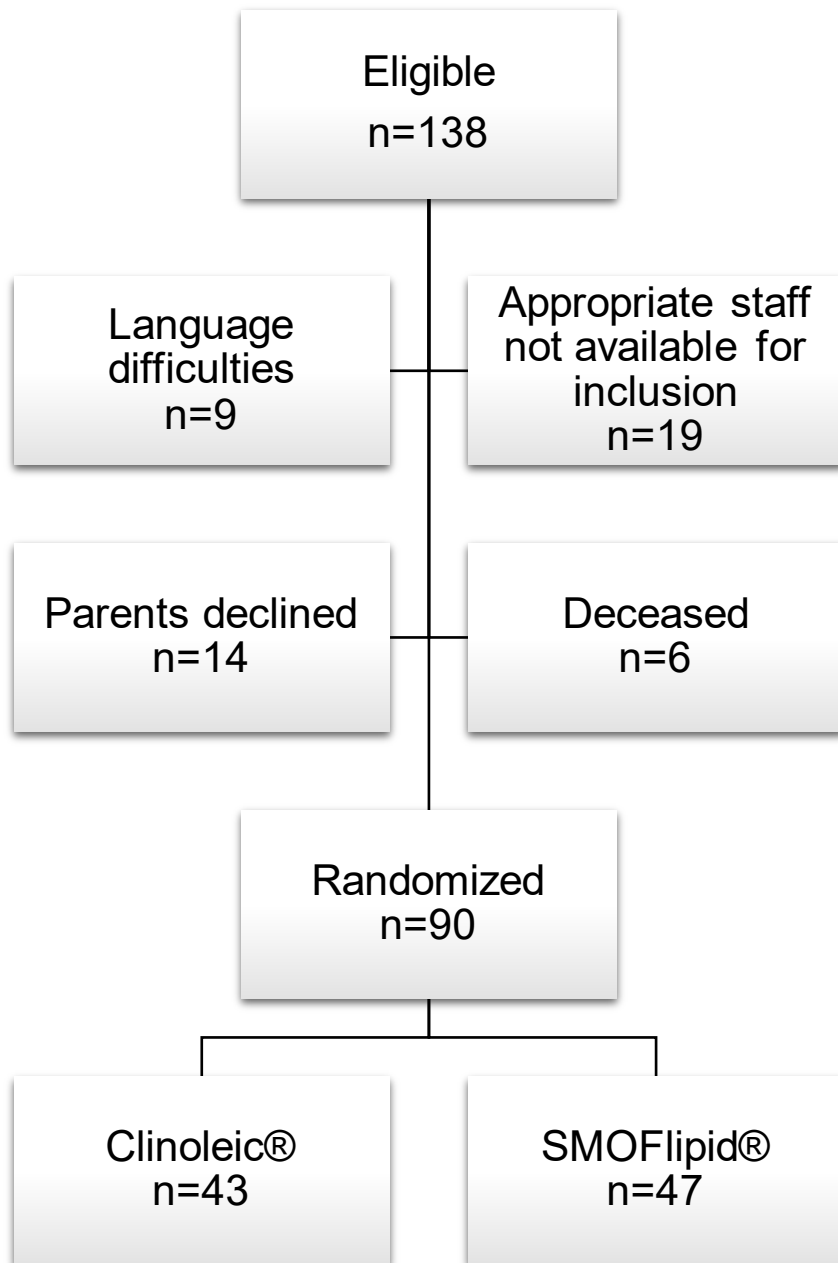

**Figure S2.** Patient enrollment flow chart.

**Table S1.** Fatty acid levels in cord blood, the first postnatal day, week and month.

|                        | <b>Cord blood</b><br>n=40           | <b>Day 1</b><br>n=90                | <b>Day 7</b><br>n=84                | <b>Day 8-28*</b><br>n=72            |
|------------------------|-------------------------------------|-------------------------------------|-------------------------------------|-------------------------------------|
| omega-3<br>fatty acids |                                     |                                     |                                     |                                     |
| ALA<br>mol%            | 0.02 (0.03)<br>0.01 (0.01-0.02)     | 0.10 (0.32)<br>0.04 (0.02-0.09)     | 0.12 (0.13)<br>0.10 (0.08-0.13)     | 0.10 (0.06)<br>0.09 (0.07-0.12)     |
| EPA<br>mol%            | 0.52 (0.24)<br>0.46 (0.36-0.66)     | 0.60 (0.09)<br>0.55 (0.41-0.68)     | 0.91 (0.61)<br>0.83 (0.37-1.45)     | 0.91 (0.39)<br>0.84 (0.61-1.14)     |
| DHA<br>mol%            | 3.30 (0.86)<br>3.30 (2.74-3.66)     | 3.23 (0.84)<br>3.21 (2.69-3.76)     | 2.22 (0.49)<br>2.16 (1.88-2.54)     | 2.49 (0.50)<br>2.50 (2.07-2.90)     |
| omega-6<br>fatty acids |                                     |                                     |                                     |                                     |
| LA<br>mol%             | 6.39 (1.35)<br>6.34 (5.56-6.92)     | 7.25 (2.13)<br>6.89 (5.90-8.10)     | 14.79 (2.58)<br>14.82 (13.51-16.59) | 14.02 (2.04)<br>14.24 (12.47-15.73) |
| AA<br>mol%             | 16.17 (2.42)<br>16.39 (14.65-18.12) | 14.58 (2.52)<br>14.53 (13.39-15.86) | 8.00 (1.37)<br>7.95 (7.03-9.04)     | 7.94 (1.27)<br>7.94 (7.13-8.79)     |

Mean (SD), median (25<sup>th</sup> –75<sup>th</sup> percentile)

\* Area under the curve, calculated by the trapezoidal rule using all samples and sampling days during the period of interest, divided by time to generate average fatty acid levels.
